# Supplementary material
Source: Springer Nature journal article supplement (https://www.springermedizin.de/resource/supplementary/12874_2009_356_MOESM1_ESM.pdf/9434300)
Supplement: MOESM1 [file 9434300]

| Northern Ireland (NI)                                                                  | Republic of Ireland (RoI)                                                                                                                                                           |
|----------------------------------------------------------------------------------------|-------------------------------------------------------------------------------------------------------------------------------------------------------------------------------------|
| National Health Service (NHS) funds 90% of health care through government taxation.    | Health care funded through a mixture of general taxation, social and private insurance and personal 'out of pocket' expenses.                                                       |
| Everyone has free access to hospital care and a family practitioner.                   | Hospital care is free of charge for all.                                                                                                                                            |
| Charges for each prescription item are subsidised by the government.                   | Only those on the lowest income (approx 27%) have free access to a Family                                                                                                           |
| Many people are exempted from payment for prescriptions for medical or social reasons. | Practitioner and to free prescriptions: these are classified as General Medical Services (GMS) patients.                                                                            |
| Almost 90% of all prescriptions are dispensed free of charge.                          | Non-GMS patients must pay for visits to the family practitioner and practice nurse approx €35-50 per visit (£24-34) and for all prescriptions up to a value of €75 (£50) per month. |
| High Starfield score.*                                                                 | Intermediate Starfield score.*                                                                                                                                                      |

*\*The Starfield score reflects the strength of primary care in a country. (Starfield B. Primary care:*

*Balancing health needs, services and technology. Oxford University Press, Oxford 1998).*
